# Supplementary material for: Using traditional ecological knowledge to develop capacity for biodiversity conservation beyond protected areas
Source: Research Square preprint supplement (doi:10.21203/rs.3.rs-6262255/v1), 2025-04-21
Supplement: Supplementary file 1 [file 307ae539c2822408cd740779.pdf]

| <b>Ecosystem type</b> | <b>Ethnic group</b> | <b>Use Category</b> | <b>Key Themes</b>                                                                                                                                                                                                                                                  | <b>Example Quotes</b>                                                                                                                     |
|-----------------------|---------------------|---------------------|--------------------------------------------------------------------------------------------------------------------------------------------------------------------------------------------------------------------------------------------------------------------|-------------------------------------------------------------------------------------------------------------------------------------------|
| Savanna Rangeland     | <i>Maasai</i>       | Food                | Knowledge of edible plants is gender-specific; Females focus on vegetables, while younger generations are familiar with fruits somehow                                                                                                                             | “Kids nowadays go to school and watch television, they have less time to interact with nature, though they still know some fruit species” |
|                       |                     | Material            | Females hold knowledge of plant species essential for house-building due to traditional gender roles                                                                                                                                                               | “Females are the ones who build the house and know plants useful for building”.                                                           |
|                       |                     | Medicine            | Males possess broader knowledge of general treatments, especially for ailments affecting males, while Females focus on treatments for children and women                                                                                                           | “Males treat diseases related to men health, while females know what to use for children and other Females”.                              |
| Flooded Savanna       | <i>Pogoro</i>       | Food                | Young people know fruit species, while Females focus on vegetables, reflecting traditional gender roles                                                                                                                                                            | “Fruit species are more known to young ones, while vegetables are known to females because of their roles”.                               |
|                       |                     | Material            | Limited knowledge among females, except for materials used in crafting; traditional crafts knowledge is declining.                                                                                                                                                 | “Females know only the materials they use in crafting”.                                                                                   |
|                       |                     | Medicine            | Males specialise in general disease treatments, while females are more knowledgeable about remedies for children's and women's health; stigma affects youth usage.<br>Transfer of traditional medicine knowledge is more apparent to traditional healers (Wambui). | “Only ‘Wambui’ are now passing medicinal knowledge to their kids; youth feel using traditional medicine makes them look naive”.           |
|                       |                     | Rituals             | Females hold knowledge of rituals, especially those concerning young girls, maintaining certain cultural practices                                                                                                                                                 | ‘Females know the rituals for young girls’                                                                                                |

|                 |                 |          |                                                                                                                                                                               |                                                                                                                           |
|-----------------|-----------------|----------|-------------------------------------------------------------------------------------------------------------------------------------------------------------------------------|---------------------------------------------------------------------------------------------------------------------------|
| Coastal Forests | <i>Zigua</i>    | Food     | Females are more knowledgeable about fruits found in their gardens but cultural norms limit their forest knowledge.                                                           | “Females know food plant species but don't go to the forest”.                                                             |
|                 |                 | Material | Youth, particularly males, are less familiar with forest plants for material use due to alternative occupations like motorcycling.                                            | “Males youth should know material species but most work as ' <i>bodaboda</i> ' no one interested in going to the forest”. |
|                 |                 | Medicine | Older males are the primary holders of medicinal plant knowledge; younger people rely more on modern medicine.                                                                | “Most people use modern medicine; Females stay home, so they know less about forest medicines”.                           |
|                 |                 | Rituals  | Certain species are culturally believed to prevent bad luck, though this belief is more prevalent among older generations.                                                    | “Some plants are used to dissolve bad luck”.                                                                              |
| Miombo Woodland | <i>Nyamwezi</i> | Food     | Edible plants like ' <i>mlenda</i> ' are still main vegetable in most homes. Edible wild fruits are also used particularly by those engaged in herding livestock in the wild. | “We still use <i>mlenda</i> as a vegetable at home, and some fruits especially when herding livestock”.                   |
|                 |                 | Material | Shrinking forests have led to a decline in knowledge and availability of species used in construction and crafts.                                                             | “Forests are shrinking, and many plant species are disappearing”.                                                         |
|                 |                 | Medicine | Older individuals maintain knowledge of traditional medicines, while youth only use them as a last resort.                                                                    | “When we were young, we used these medicines, but youth now go to the hospital except in rare cases”.                     |
|                 |                 | Rituals  | Certain plants are used in rituals, though interaction with these plants is limited among younger generations.                                                                | “Youth only know some rituals, like when a family has twins or a breech “ <i>kashinji</i> ”                               |
|                 | <i>Nyaturu</i>  | Food     | Vegetables and wild fruits remain important dietary staples at home and for those who venture into the wild, especially during lean periods.                                  | “People still use <i>mlenda</i> as a vegetable at home and gather wild fruits when they go into the wild”.                |
|                 |                 | Material | Knowledge of building materials is predominantly male-driven due to their role in house construction.                                                                         | “Males know better about building plants because they handle construction and furniture-making”.                          |

|                 |               |          |                                                                                                                                                          |                                                                                                                           |
|-----------------|---------------|----------|----------------------------------------------------------------------------------------------------------------------------------------------------------|---------------------------------------------------------------------------------------------------------------------------|
|                 |               | Rituals  | Females lead ritual practices involving species like 'Muhuvi' and males are culturally restricted from participating in these rituals involving females. | “Only females use <i>Muhuvi</i> tree for prayers; males cannot come close during these rituals”.                          |
| Montane Forests | <i>Chagga</i> | Food     | Shift to modern agriculture has reduced reliance on wild plants, though Females still retain the knowledge of native edible species.                     | “In the past, we relied on wild vegetables, but now we have other crops”.                                                 |
|                 |               | Material | Commercial use of timber species has increased deforestation, affecting non-timber plants previously valued for other uses.                              | “Even non-timber trees are now being cut for commercial timber, and native species are not being replanted”.              |
|                 |               | Medicine | Males and females specialize in treating ailments relevant to their gender roles; however, younger people are more inclined to rely on modern medicine.  | “Older people use traditional medicines, but young ones prefer the hospital even though they know these medicines exist”. |
|                 |               | Rituals  | Some species are culturally protected due to their symbolic importance, such as trees forbidden from being cut.                                          | “ <i>Mkuu</i> trees are forbidden from being cut as they have symbolic significance”.                                     |
